# Supplementary material
Source: Springer Nature journal article supplement (https://www.springermedizin.de/resource/supplementary/12891_2013_1935_MOESM2_ESM.pdf/9508838)
Supplement: MOESM2 [file 9508838]

|                                                                |                                                                                                                                                                                                                                                                                                                                                                                                                                                                                                                                                                                                                                                                                                                                                                                                                                                                                                                                                                                                                                                                                                                                                                                                                                                       |
|----------------------------------------------------------------|-------------------------------------------------------------------------------------------------------------------------------------------------------------------------------------------------------------------------------------------------------------------------------------------------------------------------------------------------------------------------------------------------------------------------------------------------------------------------------------------------------------------------------------------------------------------------------------------------------------------------------------------------------------------------------------------------------------------------------------------------------------------------------------------------------------------------------------------------------------------------------------------------------------------------------------------------------------------------------------------------------------------------------------------------------------------------------------------------------------------------------------------------------------------------------------------------------------------------------------------------------|
| Name                                                           | Education: percentage of patients with lateral epicondylalgia (LE) for whom their health provider gave them education and counseling strategies for reduction of risk factors.                                                                                                                                                                                                                                                                                                                                                                                                                                                                                                                                                                                                                                                                                                                                                                                                                                                                                                                                                                                                                                                                        |
| Domain (component of care)                                     | Process (Educational interventions).                                                                                                                                                                                                                                                                                                                                                                                                                                                                                                                                                                                                                                                                                                                                                                                                                                                                                                                                                                                                                                                                                                                                                                                                                  |
| Description                                                    | This measure is used to assess the percentage of patients aged greater than or equal to 18 years diagnosed with LE who received education and counseling regarding risk factors.                                                                                                                                                                                                                                                                                                                                                                                                                                                                                                                                                                                                                                                                                                                                                                                                                                                                                                                                                                                                                                                                      |
|                                                                | Denominator                                                                                                                                                                                                                                                                                                                                                                                                                                                                                                                                                                                                                                                                                                                                                                                                                                                                                                                                                                                                                                                                                                                                                                                                                                           |
|                                                                | Numerator                                                                                                                                                                                                                                                                                                                                                                                                                                                                                                                                                                                                                                                                                                                                                                                                                                                                                                                                                                                                                                                                                                                                                                                                                                             |
| Evidence supporting the criterion of quality for the indicator | Inclusions: All patients aged greater than or equal to 18 years with LE.                                                                                                                                                                                                                                                                                                                                                                                                                                                                                                                                                                                                                                                                                                                                                                                                                                                                                                                                                                                                                                                                                                                                                                              |
|                                                                | Exclusions: Documentation that education was not possible or pertinent.                                                                                                                                                                                                                                                                                                                                                                                                                                                                                                                                                                                                                                                                                                                                                                                                                                                                                                                                                                                                                                                                                                                                                                               |
|                                                                | Inclusions: All patients who received education and counseling strategies for reduction of risk factors.                                                                                                                                                                                                                                                                                                                                                                                                                                                                                                                                                                                                                                                                                                                                                                                                                                                                                                                                                                                                                                                                                                                                              |
|                                                                | Exclusions: None.                                                                                                                                                                                                                                                                                                                                                                                                                                                                                                                                                                                                                                                                                                                                                                                                                                                                                                                                                                                                                                                                                                                                                                                                                                     |
|                                                                | Recommendation: IF a patient has symptomatic lateral epicondylalgia, THEN education in self-management of epicondylalgia risk factors (repetitive movements, force, posture) should be given or recommended at least once.                                                                                                                                                                                                                                                                                                                                                                                                                                                                                                                                                                                                                                                                                                                                                                                                                                                                                                                                                                                                                            |
|                                                                | Evidence level / strength recommendation: High / Strong.                                                                                                                                                                                                                                                                                                                                                                                                                                                                                                                                                                                                                                                                                                                                                                                                                                                                                                                                                                                                                                                                                                                                                                                              |
|                                                                | References:<br><br>Haahr J, Andersen J. Physical and psychosocial risk factors for lateral epicondylitis: a population based case-referent study. <i>Occup Environ Med</i> . 2003; 60:322–9.<br>Haahr J, Andersen J. Prognostic factors in lateral epicondylitis: a randomized trial with one-year follow-up in 266 new cases treated with minimal occupation intervention or the usual approach in general practice. <i>Rheumatology</i> . 2003; 42:1216–25.<br>Upper limb disorders: occupational aspects of management. A national guideline. In: National Quality Measures Clearinghouse™ (NQMC) [Internet]. [Cited 2011 Nov 24]. Available from: <a href="http://www.guideline.gov/content.aspx?id=15040&amp;search=Work+environment+">http://www.guideline.gov/content.aspx?id=15040&amp;search=Work+environment+</a> .<br>Nilsson P, Baigi A, Swärd L, Möller M, Månsson J. Lateral epicondylalgia: a structured programme better than corticosteroids and NSAID. <i>Scand J Occup Ther</i> . 2012 Sep; 19(5):404-10.<br>Van Rijn RM, Huisstede BM, Koes BW, Burdorf A. Associations between work-related factors and specific disorders at the elbow: a systematic literature review. <i>Rheumatology (Oxford)</i> . 2009 May; 48(5): 528-36. |
| Data source (method of data collection)                        | Medical record (Review).                                                                                                                                                                                                                                                                                                                                                                                                                                                                                                                                                                                                                                                                                                                                                                                                                                                                                                                                                                                                                                                                                                                                                                                                                              |
| Computation of the measure                                     | Proportion.                                                                                                                                                                                                                                                                                                                                                                                                                                                                                                                                                                                                                                                                                                                                                                                                                                                                                                                                                                                                                                                                                                                                                                                                                                           |
